# Supplementary material
Source: PubMed Central journal article supplement (PMC5789950)
Supplement: pnas.1718172115.sapp.pdf [file pnas.1718172115.sapp.pdf]

## Supporting Information

### Glycoengineering of Antibody (Herceptin) Through Yeast Expression and *in vitro* Enzymatic Glycosylation

Chiu-Ping Liu<sup>a,b</sup>, Tsung-I Tsai<sup>c</sup>, Ting Cheng<sup>a</sup>, Vidya S. Shivatare<sup>a</sup>, Chung-Yi Wu<sup>a,†</sup>,  
Chung-Yi Wu<sup>a,‡</sup>, Chi-Huey Wong<sup>a,b,c,1</sup>

<sup>a</sup> Genomics Research Center, Academia Sinica, Taipei 115, Taiwan.

<sup>b</sup> Institute of Biotechnology, National Taiwan University, Taipei 106, Taiwan.

<sup>c</sup> Department of Chemistry, The Scripps Research Institute, La Jolla, California 92037.

<sup>†</sup> Postdoctoral Fellow, Genomics Research Center, Academia Sinica.

<sup>‡</sup> Research Fellow, Genomics Research Center, Academia Sinica.

<sup>1</sup> To whom correspondence may be addressed. Email: chwong@gate.sinica.edu.tw

#### *SI Materials and Methods*

##### **Materials**

All nucleotides and chemicals were purchased from Sigma-Aldrich (St. Louis, MO). Restriction endonucleases and T4 DNA ligase were from NEB (Beverly, MA), primers were from Mission Biotech (Taiwan), and Ni-NTA Agarose were from Qiagen (Santa Clarita, CA). Plasmids pPICZαA, pET28a, *Pichia pastoris* X33 strains, and *Escherichia coli* strains TOP10 or DH5α used for recombinant DNA work were from Life Technologies CO., Ltd (Grand Island, NY). The Pichia GlycoSwitch® strains SuperMan5 and SuperMan5 (his-) were from BioGrammatics, Inc (Carlsbad, California). α2,6-Sialylglycopeptide was from Fushimi Pharmaceutical (Kagawa, Japan).

##### **Construction of antibody expression vectors**

Sequences of anti-HER2 were based on Canadian patent CA 2103059. All genes were obtained via cDNA synthesis and were ligated into the modified pPICZαA vector with N-terminal α-factor for protein secretion. The plasmids with correct sequences were transformed into DH5α competent cells by chemical transformation. Single colonies were picked and inoculated into TB medium with Zeocin antibiotics overnight, and the cell cultures were used for large amount plasmid DNA extraction.

### **Site-directed mutagenesis**

The site-specific mutagenesis of all double-stranded plasmid DNA was employed Q5<sup>®</sup> Site-Directed Mutagenesis Kit (NEB, Beverly, MA) and transformed into DH5α competent cells by chemical transformation. Single colonies were picked and inoculated into TB medium with Kanamycin antibiotics overnight, and the cell cultures were used for plasmid DNA extraction and DNA sequencing.

### **Expression of enzymes**

All endoglycosidases (ENGases) genes were obtained via PCR from genomic DNA or cDNA library, and the PCR products were ligated into the expression vector pET28a with N- or C-terminal His-tag modification for further purification. All plasmid DNAs were purified and transfected into *BL21* (DE3) chemically competent *E. coli* cells. Single colony was grown overnight at 37°C in TB medium with kanamycin antibiotics, diluted to 1:100 in fresh TB medium with kanamycin and grown for 4 hours to mid-exponential phase. The expression of protein ENGases was induced by 0.1mM IPTG at 16°C for 24 hours. The cells were harvested and suspended with an extraction buffer (50mM sodium phosphate, 300mM sodium chloride, and 10mM imidazole, pH7.0), then purified by using microfluidizer M-110L (Hyland Scientific, WA) and Ni-NTA agarose beads (GE Healthcare, MA). The

protein was eluted in the same buffer containing a higher concentration of imidazole (250mM) and the concentration was determined by Qubit Protein Quantitation (Invitrogen, CA).

### **Transformation of antibody expression plasmids into *P. pastoris***

The plasmid DNA was linearized with *SacI*, and then transformed into *P. pastoris* X33 competent cells using *Pichia* EasyComp™ Kit (Invitrogen, CA). Single colonies were picked and confirmed by using QuickExtract™ DNA Extraction Solution (Epicentre Tech Corp, WI) and PCR.

### **Transformation of antibody expression plasmids into GlycoSwitch® strains**

GlycoSwitch® strain SuperMan<sub>5</sub> was used as the host strain for expression of trastuzumab. The core GlycoSwitch® strain has a central glycan processing enzyme (OCH1) disrupted to prevent glycan elongation, and express a foreign mannosidase to trim existing glycans to a more uniform Man<sub>5</sub> structure. White single colonies were picked and confirmed by using QuickExtract™ DNA Extraction Solution (Epicentre Tech Corp, WI) and PCR.

### **Fermentation conditions**

Correct transformants were inoculated in buffered glycerol-complex medium (BMGY) and grown at 30°C for 48 hours followed by a 24-96 hour induction in buffer methanol-complex medium (BMMY) at 23°C with shaking.

### **Antibody purification**

The antibody was captured by affinity chromatography from the supernatant medium of fermentations using a HiTrap Protein A FF resin and Protein L resin (GE Healthcare, MA). The resin was equilibrated with PBS pH7.4 and the supernatant medium was adjusted at

the same pH value. The column was washed with at least 5 column volumes of the same buffer and the antibody was eluted with 100mM of Glycin-HCl, pH2.3. The eluted protein was neutralized immediately with 1M of Tris-HCl to pH7.0.

### **SDS-PAGE detection of *E. coli* expressed ENGases and glycoengineered Herceptin antibodies**

All the SDS-PAGE analyses were performed with NuPAGE® Novex® 4-12% Bis-Tris gel (Invitrogen, MA) in MOPS buffer either with or without DTT addition in samples.

### **Preparation of mono-GlcNAc-Trastuzumab**

Recombinant trastuzumab with high-mannose type glycans in a PBS (1X, pH7.0) was incubated with EndoH or selected endoglycosidases (trastuzumab : endoglycosidase = 20 : 1 in weight ratio) at 37°C for 20 hours. LC-MS and SDS-PAGE analysis indicated the complete cleavage of the *N*-glycans on the heavy chain. The reaction mixtures were subjected to affinity chromatography on a column of protein A-agarose resin (1mL; GE Healthcare) pre-equilibrated with a sodium phosphate buffer (20mM, pH7.0). Then the column was washed with a sodium phosphate buffer (20mM, pH7.0, 10mL). The bound IgG was eluted with glycine-HCl buffer (50mM, pH2.3, 10mL), and the elution fractions were immediately neutralized with Tris-HCl buffer (1M, pH8.0). The antibody fractions were combined and concentrated by centrifugal filtration (Amicon Ultra centrifugal filter, Millipore, Billerica, MA) to give mono-GlcNAc trastuzumab. The product was trypsinized, and the glycopeptides, TKPREEQYNSTYR and EEQYNSTYR were analyzed using nanospray LC/MS to confirm the glycosylation patterns.

### **Transglycosylation of mono-GlcNAc trastuzumab (rHer-G) with SGP**

$\alpha$ 2,6-Sialylglycopeptide (SGP, 300mM) was added to the mixture of an Endo-S2 WT and mono-GlcNAc trastuzumab in TAPS buffer (pH7.4). Trastuzumab-GlcNAc : Endo-S2 WT : sialylglycopeptide ( $\alpha$ 2,6) = 14.4 : 270 : 1 (by weight ratio). The solution was incubated for 15 minutes to 15 hours at 37°C without shaking. Transglycosylation efficiency was evaluated by SDS-PAGE analysis. The ratio of protein bands on SDS-PAGE was calculated by ImageQuant TL (GE Healthcare, MA) software.

### **Western blot**

Proteins subjected to SDS-PAGE were transferred to PVDF membrane using iBlot® Module (Invitrogen, CA, USA). Unoccupied protein binding sites on the PVDF membrane were saturated by incubating with 3% skim milk (in 1XTBS) for one hour. Full-length and truncated forms of trastuzumab protein were detected using HRP-conjugated anti-human IgG antibodies. Briefly, membranes were incubated for one hour with HRP-conjugated anti-human IgG antibody (1/5000 dilution) followed by triplicate washing by TBST buffer, and the bound antibody was detected using ECL plus western blot detection kit.

### **Analysis of glycopeptides using LC-MS/MS**

The glycopeptides with or without endoglycosidase treatment were analyzed by high resolution and high mass accuracy nanoflow LC-MS/MS. Glycopeptide samples were injected at 10  $\mu$ L/min into a precolumn (150  $\mu$ m I.D.  $\times$  30 mm, 5  $\mu$ m, 200 Å) and then separated in a reverse phase C18 nano-column (75  $\mu$ m I.D.  $\times$  200 mm, 3  $\mu$ m, 200 Å) for analysis in an LTQ Orbitrap XL ETD mass spectrometer (Thermo Fisher Scientific) equipped with a nanoelectrospray ion source (New Objective). Separation was performed at

300 nL/min using 0.1% formic acid in water as mobile phase A and 0.1% formic acid in 80% acetonitrile as mobile phase B. Survey full scan MS spectra (from  $m/z$  320 to 2000) were acquired in the orbitrap with a mass resolution of 30,000 at  $m/z$  400. The three most intense ions were sequentially isolated for HCD (Resolution 7500) and the electrospray voltage was maintained at 1.8 kV with the capillary temperature set at 200°C. The MS spectra were acquired for composition assignment and quantitation of glycopeptides. Assignment of glycopeptides was based on matching the measured masses with the database, which combined predicted masses of tryptic peptides (by Protein Digest Simulator Basic) and *N*- and *O*-linked glycans (from the Consortium of Functional Glycomics), as well as the retention time of the glycopeptides by in-house software. Each assigned glycopeptide was confirmed by the appearance of glycan fragments in its MS/MS spectra.

### **FcγRIIIA analyte biotinylation**

Recombinant Human Fc gamma RIIIA/CD16a Protein (FcγRIIIA) (R&D Systems, MN) analyte was biotinylated by using EZ-Link Sulfo-NHS-LC-LC-Biotin (sulfosuccinimidyl-6-[biotinamido]-6-hexanamido hexanoate) Kit (Invitrogen, CA, USA) as instructed by the manufacturer, and dialyzed against PBS (pH7.0) and concentrated with Vivaspin 0.5 columns from Sartorius Stedim (1000 MWCO PES).

### **Biolayer interferometry (BLI) analysis**

BLI experiments were performed on an Octet<sup>®</sup> HTX System (FortéBio<sup>®</sup>) at 30°C with an agitation speed of 1000 rpm. Streptavidin coated biosensors (PALL/FortéBio<sup>®</sup>, 18-5021)

were loaded with biotinylated recombinant human FcγRIIIA (2.5μg/ml) in PBS buffer pH7.0 for 300 seconds. Immobilization levels were between 0.6-1.0 nm. For association (for  $k_{on}$ ) monitoring, IgG samples were diluted with PBS buffer pH7.0 to suitable concentrations (50, 100, 200, 400nM for Herceptin<sup>®</sup>; 1, 5, 10, 20nM for rHer-M5 and rHer-SCT) and transferred to a solid-black 96 well plate (Greiner Bio-One, 655900). IgG samples were allowed to bind to FcγRIIIA loaded biosensors for 360 seconds (association phase). The dissociation phase (for  $k_{off}$ ) was recorded for 300 seconds. The sensorgrams were measured and referenced against the buffer reference signal by the Data Analysis Software 9.0.0.10 (FortéBio<sup>®</sup>). The sensorgrams with the concentrations signals of each association and dissociation phase were combined and processed with referencing for background subtraction and fitted to a 1:1 binding model.

### **Glycan Microarray on NHS-activated glass slides**

The synthetic *N*-glycan ligands were printed on NHS-activated glass slides through amide bond formation, with 100 μM each of glycans. Each sample was printed with three replicates, and slide images were obtained from a fluorescence scan after incubation with DyLight649-conjugated donkey anti-human IgG antibody. The incubation time of ENGases (1mg/ml) for glycans cleavage was 16 hours at 30°C with shaking. Two human IgG antibodies, PG16 and 2G12 were used for binding to the α2,6-sialylated complex-type oligosaccharides and mannose type oligosaccharides, respectively.

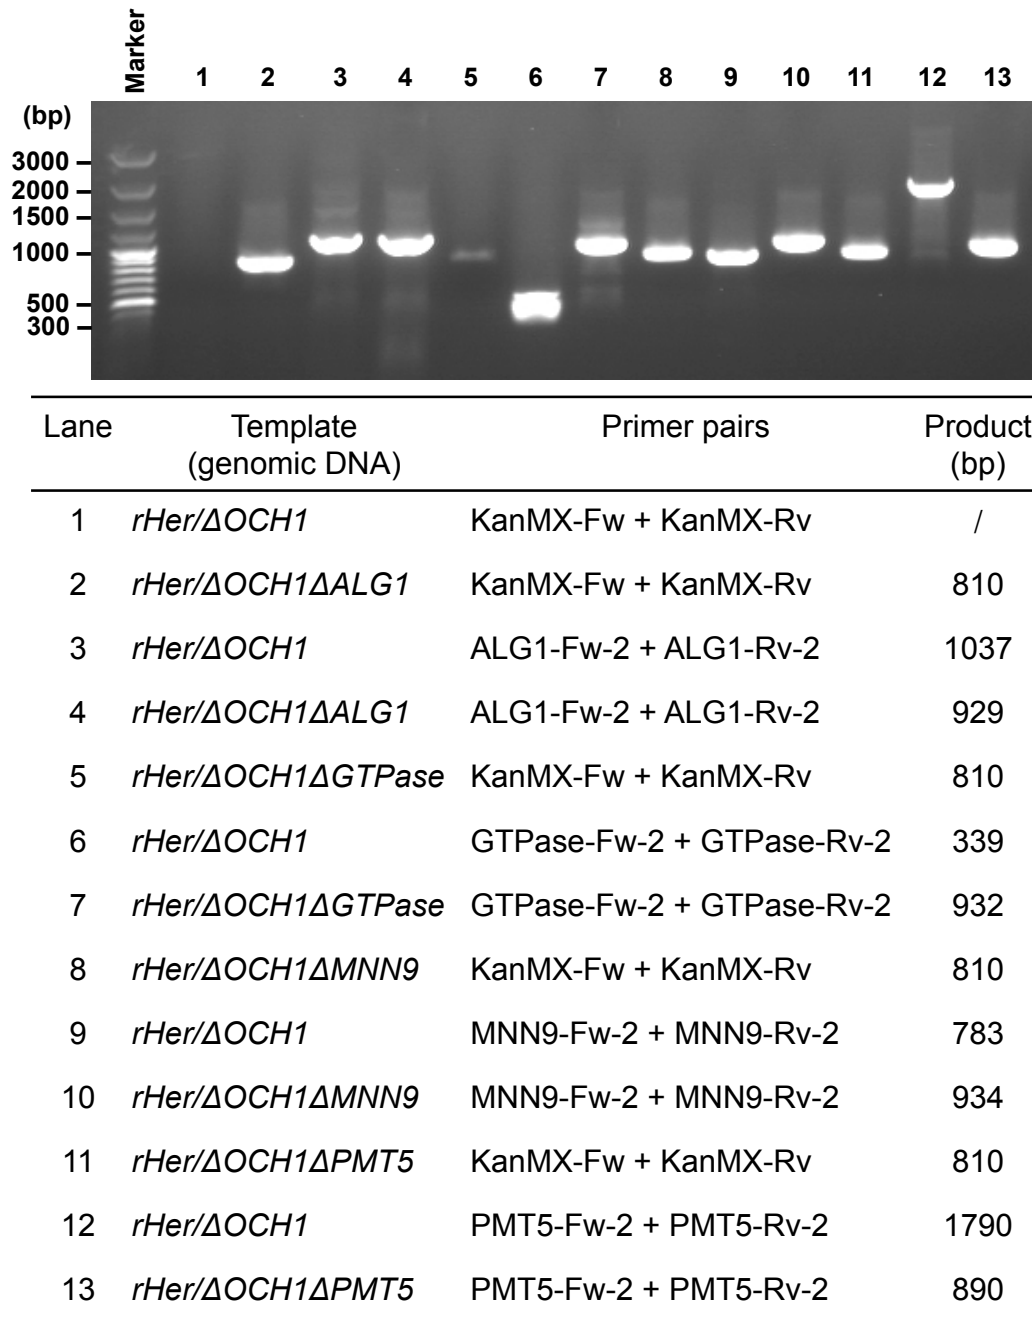

**Fig. S1.** Identification of knockout genes by using the polymerase chain reaction (PCR) and the gel electrophoresis. Primers and length of PCR products were listed below the gel picture.

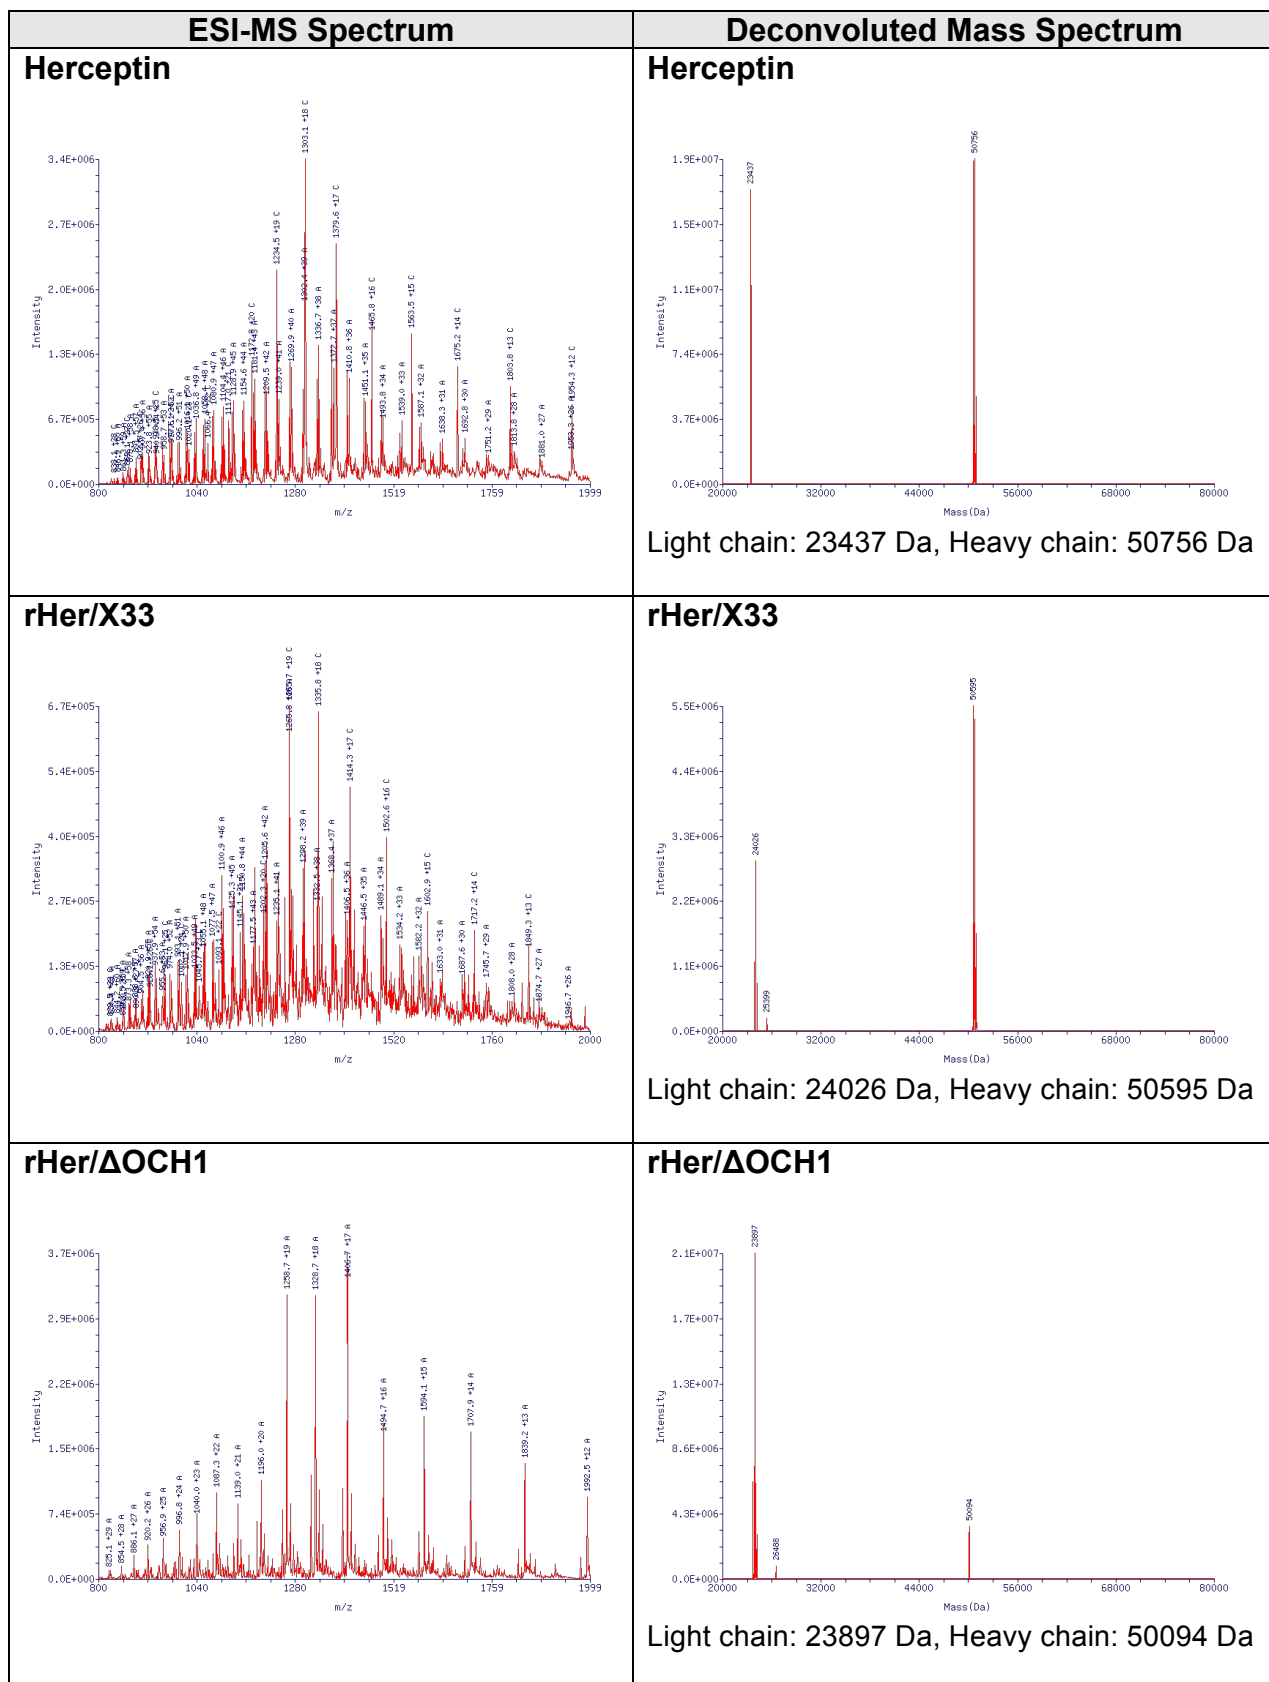

**Fig. S2.** A comparison of ESI-MS and deconvoluted mass within reduced Herceptin, rHer-X33, and rHer-M5 (=rHer/ΔOCH1).

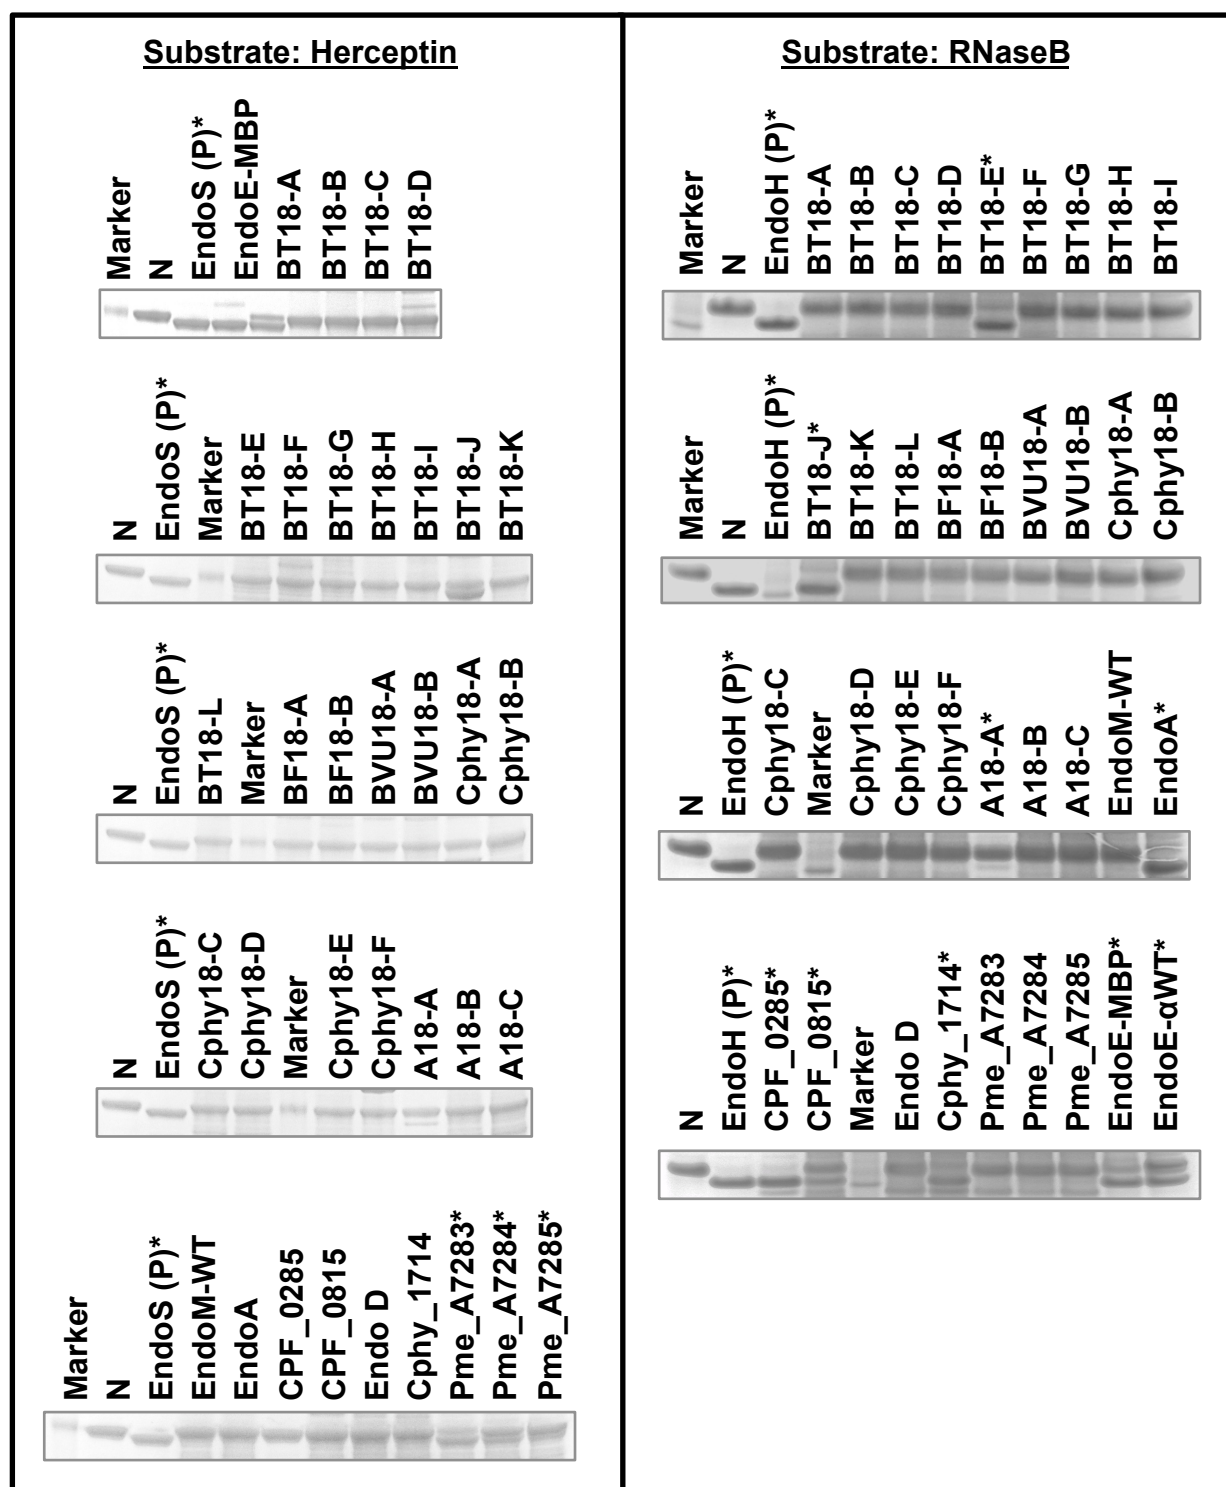

**Fig. S3.** Screening of useful ENGases which were expressed in *E. coli* by using commercial Herceptin (with complex type glycans on the Fc region, in the left panel) and RNaseB (with high mannose type glycans, in the right panel) as the substrates. Effective ENGase were labeled with the star symbol that was presented band-shifted on the SDS-PAGE.

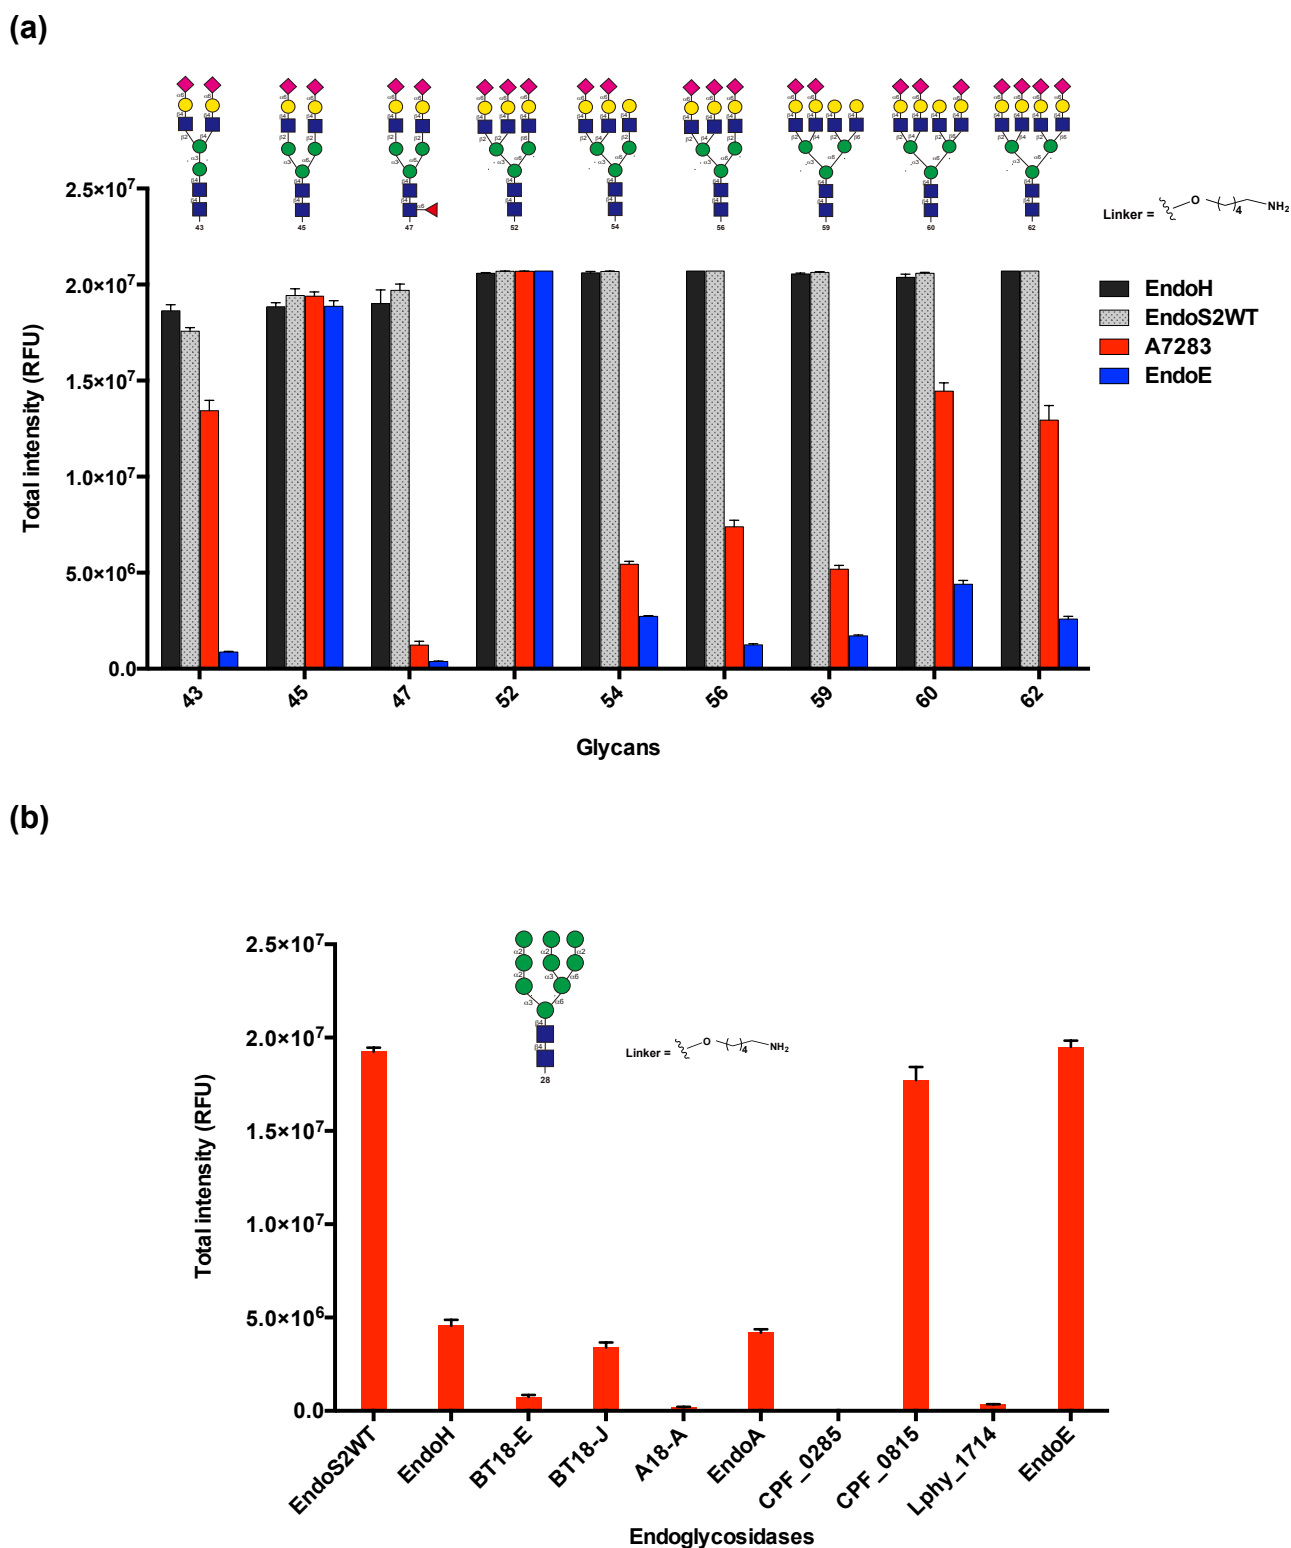

**Fig. S4.** Characterization of ENGases which catalyzed the hydrolysis of multi-antennary complex type and mannose type *N*-glycans on the array with OC<sub>5</sub>NH<sub>2</sub> linker. (a) Binding of PG16 antibody (an antibody which recognizes glycans with terminal sialic acids) to a panel of arrayed glycans after treatment with various ENGases. (b) Binding of 2G12 antibody (an antibody which recognize Man<sub>9</sub> glycans) to the Man<sub>9</sub>-GlcNAc-GlcNAc-OC<sub>5</sub>NH<sub>2</sub>-linked array after treatment with various ENGases. The mean signal intensities (RFU) and standard errors calculated for three independent replicates on the array are shown.

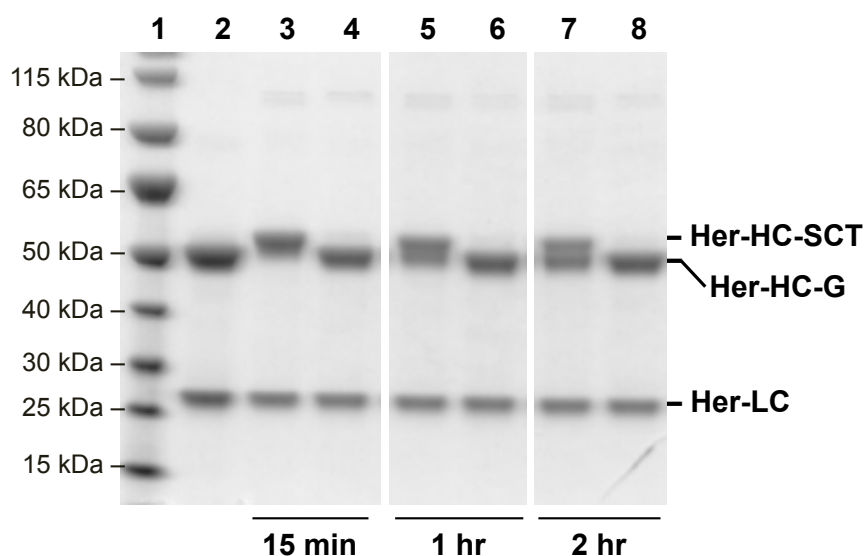

**Lane 1: Marker**

**Lane 2: rHer-GlcNAc**

**Lane 3: rHer-GlcNAc + oxazoline-SCT + Endo-S2 D184Q\_ 15 min**

**Lane 4: rHer-GlcNAc + oxazoline-SCT + Endo-S2 WT\_ 15 min**

**Lane 5: rHer-GlcNAc + oxazoline-SCT + Endo-S2 D184Q\_ 1 hr**

**Lane 6: rHer-GlcNAc + oxazoline-SCT + Endo-S2 WT\_ 1 hr**

**Lane 7: rHer-GlcNAc + oxazoline-SCT + Endo-S2 D184Q\_ 2 hr**

**Lane 8: rHer-GlcNAc + oxazoline-SCT + Endo-S2 WT\_ 2 hr**

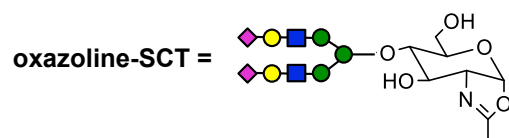

**Fig. S5.** Endo-S2 WT and Endo-S2 D184Q catalyzed transglycosylation of trastuzumab by using oxazoline-SCT as the glycan donor. rHer-GlcNAc : oxazoline-SCT : Endo-S2 WT/Endo-S2 D184Q = 20 : 10 : 1 (by weight ratio). The reaction was incubated at 37°C with shaking, and characterized by SDS-PAGE analysis. Abbreviations: rHer-GlcNAc: trastuzumab with GlcNAc on Fc-Asn297, SCT:  $\alpha$ 2,6-sialylated biantennary complex type glycan, HC: heavy chain, LC: light chain, G: GlcNAc.

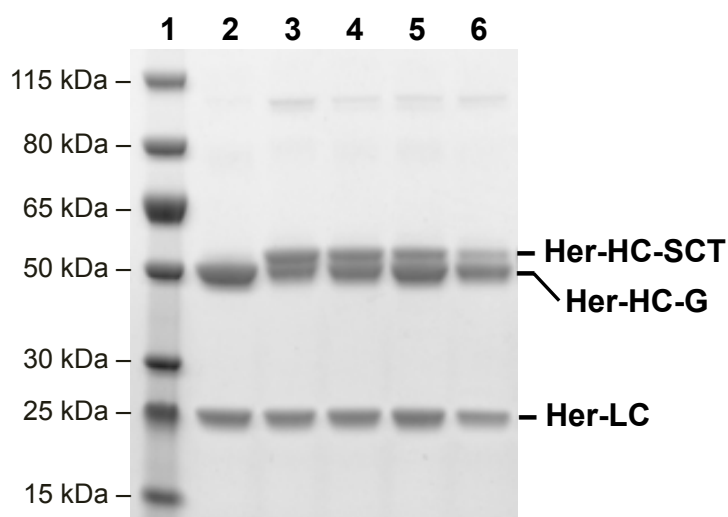

**Lane 1: Marker**

**Lane 2: rHer-GlcNAc**

**Lane 3: rHer-GlcNAc + oxazoline-SCT + Endo-S2 D184Q\_ 1 hr**

**Lane 4: rHer-GlcNAc + oxazoline-SCT + Endo-S2 D184Q\_ 2 hr**

**Lane 5: rHer-GlcNAc + oxazoline-SCT + Endo-S2 D184Q\_ 3 hr**

**Lane 6: rHer-GlcNAc + oxazoline-SCT + Endo-S2 D184Q\_ 16 hr**

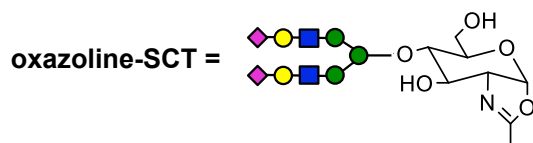

**Fig. S6.** Endo-S2 D184Q catalyzed transglycosylation of trastuzumab using oxazoline-SCT as the glycan donor with increasing time. rHer-GlcNAc : oxazoline-SCT : Endo-S2 D184Q = 20 : 10 : 1 (by weight ratio). The reaction was incubated at 37°C with shaking, and characterized by SDS-PAGE analysis. Abbreviations: rHer-GlcNAc: trastuzumab with GlcNAc on Fc-Asn297, SCT:  $\alpha$ 2,6-sialylated biantennary complex type glycan, HC: heavy chain, LC: light chain, G: GlcNAc.

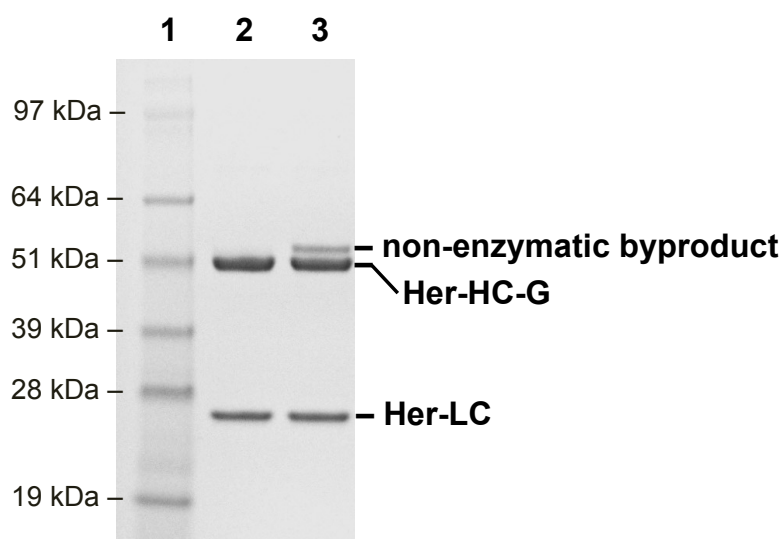

**Lane 1: Marker**

**Lane 2: rHer-GlcNAc**

**Lane 3: rHer-GlcNAc + oxazoline-SCT**

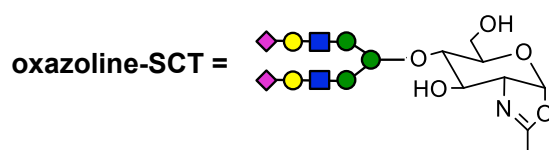

**Fig. S7.** Non-enzymatic byproducts on trastuzumab resulted from using oxazoline-SCT as the glycan donor. rHer-GlcNAc : oxazoline-SCT = 20 : 10 (by weight ratio). The reaction was incubated at 37°C for 1 hour, and characterized by SDS-PAGE analysis. Abbreviations: rHer-GlcNAc: trastuzumab with GlcNAc on Fc-Asn297; SCT:  $\alpha$ 2,6-sialylated biantennary complex type glycan; HC: heavy chain; LC: light chain; G: GlcNAc.

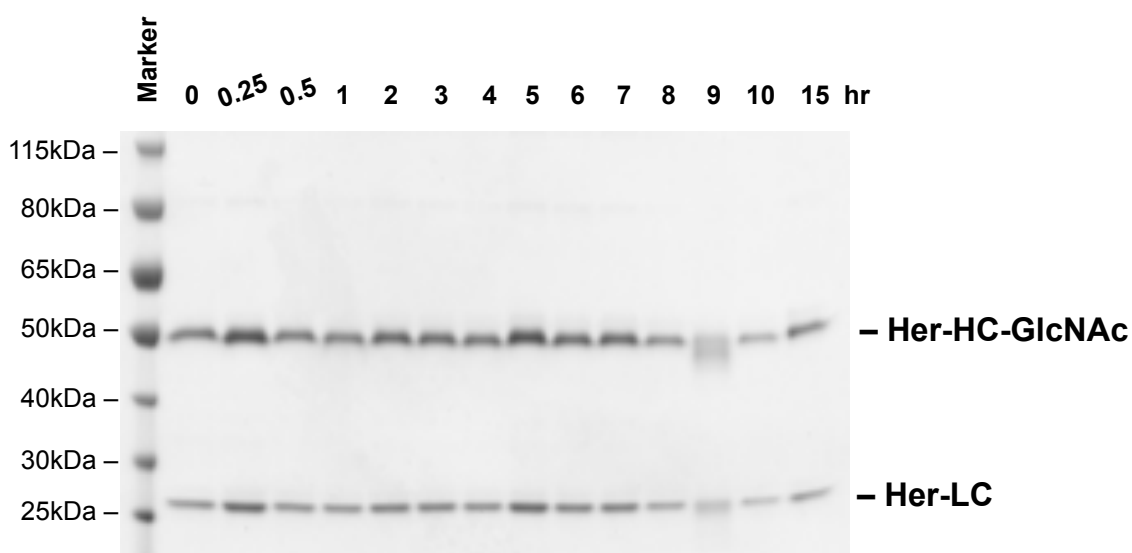

**Fig. S8.** Profiling of non-enzymatic glycosylation of trastuzumab using SGP. Trastuzumab-GlcNAc : SGP = 14.4 : 1 (by weight ratio). The final concentration of SGP is 300mM. Transglycosylation efficiency was evaluated by SDS-PAGE analysis. Abbreviations: Her: trastuzumab; HC: heavy chain; LC: light chain; SGP:  $\alpha$ 2,6-sialylated biantennary complex type glycopeptide.

**Table S1.** Oligonucleotide primers used for the amplification of the whole *OCH1*, *ALG1*, *GTPase*, *PMT5*, and *MNN9* locus from *P. pastoris* genomic DNA, for amplification of fragments to assemble KanMX integration cassette.

| Primer name     | Sequence (5' to 3')                          |
|-----------------|----------------------------------------------|
| OCH1-Fw         | ATGGCGAAGGCAGATGGCAG                         |
| OCH1-Rv         | TTAGTCCTTCCAACTTCCTTCA                       |
| ALG1-Fw-1       | ATGTCTCAGTTGAAGGAAGG                         |
| ALG1-Rv-1       | CTAAGTCAACAACTACCTA                          |
| ALG1-Fw-2       | AGCCGTGATCCTGGTTATGGGAGA                     |
| ALG1-Rv-2       | TGACATGTTCTTAATGAGCTCGGTA                    |
| GTPase-Fw-1     | ATGAGTTCCAACAAGCAAATTACAG                    |
| GTPase-Rv-1     | CTAACATTGACAGGTTGATTCCG                      |
| GTPase-Fw-2     | CACAATTGGAGATAAGACCATCAA                     |
| GTPase-Rv-2     | AACAATAGACCTTCATCATCCGCC                     |
| PMT5-Fw-1       | ATGACTCCTGAGATATTTGGTC                       |
| PMT5-Rv-1       | CTACTGAAATTGATCGCAAGGG                       |
| PMT5-Fw-2       | GGCTTTGTTTCTTGCGTTCACA                       |
| PMT5-Rv-2       | AAGATGGAGCGAAATGGAATA                        |
| MNN9-Fw-1       | ATGTTGGTGCCCAATAAAAAC                        |
| MNN9-Rv-1       | CTACTCGTTATAGTGGTAAA                         |
| MNN9-Fw-2       | CTATTGTCAAGCAAAATCCCTCC                      |
| MNN9-Rv-2       | ACCTCCAACACCATCCAGTTGCA                      |
| OCH1-KanMX-Fw   | GAAGACAATTATGGGTAAGGAAAAGACTCACGTTTCGAGG     |
| OCH1-KanMX-Rv   | CTTTCTCTTTTAACATCTCTCCTTAGAAAACTCATC         |
| ALG1-KanMX-Fw   | CGTTGTCTTTCATGGGTAAGGAAAAGACTCACGTTTCGAGGC   |
| ALG1-KanMX-Rv   | ATCAAACCTTCAAAGAAGCCACTTAGAAAACTCATCGAGCATCA |
| GTPase-KanMX-Fw | CACTTGCTCATGGGTAAGGAAAAGACTCACGTTTCGAGGC     |
| GTPase-KanMX-Rv | TCTGACCCTCTTGTACACTGTTAGAAAACTCATCGAGCATCA   |
| PMT5-KanMX-Fw   | TCACAGTGGCCGTGAGATTCTTCAATATTATGGGTAAGGAA    |
| PMT5-KanMX-Rv   | CCAACCGACAAATTAGAAAACTCATCGAGCATCAAATGA      |
| MNN9-KanMX-Fw   | ATGAACCTTACATGGGTAAGGAAAAGACTCACGTTTCGAGG    |
| MNN9-KanMX-Rv   | CTGTACTCAAATCTCCATGTGGTTAGAAAACTCATCGAGCA    |
| KanMX-Fw        | ATGGGTAAGGAAAAGACTCAC                        |
| KanMX-Rv        | TTAGAAAACTCATCGAGCATC                        |

**Table S2.** ENGases for protein *N*-glycans characterized in this study.

| No. | Abbreviation         | Organisms                                    | GenBank    | CAZy family |
|-----|----------------------|----------------------------------------------|------------|-------------|
| 1   | BT18-A [BT1038]      | <i>Bacteroides thetaiotaomicron</i> VPI-5482 | AAO76145.1 | GH18        |
| 2   | BT18-B [BT1044]      | <i>Bacteroides thetaiotaomicron</i> VPI-5482 | AAO76151.1 | GH18        |
| 3   | BT18-C [BT1048]      | <i>Bacteroides thetaiotaomicron</i> VPI-5482 | AAO76155.1 | GH18        |
| 4   | BT18-D [BT1284]      | <i>Bacteroides thetaiotaomicron</i> VPI-5482 | AAO76391.1 | GH18        |
| 5   | BT18-E [BT1285]      | <i>Bacteroides thetaiotaomicron</i> VPI-5482 | AAO76392.1 | GH18        |
| 6   | BT18-F [BT1632]      | <i>Bacteroides thetaiotaomicron</i> VPI-5482 | AAO76739.1 | GH18        |
| 7   | BT18-G [BT2825]      | <i>Bacteroides thetaiotaomicron</i> VPI-5482 | AAO77931.1 | GH18        |
| 8   | BT18-H [BT3050]      | <i>Bacteroides thetaiotaomicron</i> VPI-5482 | AAO78156.1 | GH18        |
| 9   | BT18-I [BT3753]      | <i>Bacteroides thetaiotaomicron</i> VPI-5482 | AAO78858.1 | GH18        |
| 10  | BT18-J [BT3987]      | <i>Bacteroides thetaiotaomicron</i> VPI-5482 | AAO79092.1 | GH18        |
| 11  | BT18-K [BT4406]      | <i>Bacteroides thetaiotaomicron</i> VPI-5482 | AAO79511.1 | GH18        |
| 12  | BT18-L [BT4709]      | <i>Bacteroides thetaiotaomicron</i> VPI-5482 | AAO79814.1 | GH18        |
| 13  | BF18-A [BF1312]      | <i>Bacteroides fragilis</i> NCTC 9343        | CAH07029.1 | GH18        |
| 14  | BF18-B [BF3414]      | <i>Bacteroides fragilis</i> NCTC 9343        | CAH09105.1 | GH18        |
| 15  | BVU18-A [BVU0617]    | <i>Bacteroides vulgatus</i> ATCC 8482        | ABR38325.1 | GH18        |
| 16  | BVU18-B [BVU1273]    | <i>Bacteroides vulgatus</i> ATCC 8482        | ABR38963.1 | GH18        |
| 17  | Cphy18-A [Cphy_1652] | <i>Clostridium phytofermentans</i> ISDg      | ABX42024.1 | GH18        |
| 18  | Cphy18-B [Cphy_1799] | <i>Clostridium phytofermentans</i> ISDg      | ABX42168.1 | GH18        |
| 19  | Cphy18-C [Cphy_1800] | <i>Clostridium phytofermentans</i> ISDg      | ABX42169.1 | GH18        |
| 20  | Cphy18-D [Cphy_2210] | <i>Clostridium phytofermentans</i> ISDg      | ABX42576.1 | GH18        |
| 21  | Cphy18-E [Cphy_2572] | <i>Clostridium phytofermentans</i> ISDg      | ABX42933.1 | GH18        |
| 22  | Cphy18-F [Cphy_3479] | <i>Clostridium phytofermentans</i> ISDg      | ABX44096.1 | GH18        |
| 23  | A18-A [A6286]        | <i>Prevotella melaninogenica</i> ATCC 25845  | ADK96185.1 | GH18        |
| 24  | A18-B [A7010]        | <i>Prevotella melaninogenica</i> ATCC 25845  | ADK96847.1 | GH18        |
| 25  | A18-C [A7292]        | <i>Prevotella melaninogenica</i> ATCC 25845  | ADK97249.1 | GH18        |
| 26  | EndoM                | <i>Mucor hiemalis</i>                        | BAB43869.1 | GH85        |
| 27  | EndoA                | <i>Arthrobacter protophormiae</i> AKU 0647   | AAD10851.1 | GH85        |
| 28  | CPF_0285             | <i>Clostridium perfringens</i> ATCC 13124    | ABG82341.1 | GH85        |
| 29  | CPF_0815             | <i>Clostridium perfringens</i> ATCC 13124    | ABG82927.1 | GH85        |
| 30  | EndoD                | <i>Streptococcus pneumoniae</i>              | BAB62042.1 | GH85        |
| 31  | Lphy_1714            | <i>Lachnoclostridium phytofermentans</i>     | ABX42086.1 | GH85        |
| 32  | Pme_A7283            | <i>Prevotella melaninogenica</i> ATCC 25845  | ADK97378.1 | GH85        |
| 33  | Pme_A7284            | <i>Prevotella melaninogenica</i> ATCC 25845  | ADK97201.1 | GH85        |
| 34  | Pme_A7285            | <i>Prevotella melaninogenica</i> ATCC 25845  | ADK97032.1 | GH85        |
| 35  | EndoE                | <i>Enterococcus faecalis</i> V583            | AAO79989.1 | GH18/20     |
